# Supplementary material for: Cancer-associated Systemic Abnormality: A Novel Marker Panel for Early-stage Breast Cancer Characterization
Source: Preprints.org preprint supplement (doi:10.20944/preprints202402.0681.v1), 2024-02-12
Supplement: Supplementary file 1 [file supplementary]

**Raw Data**

**Supplemented table S1**. Test results control cohort

| Systemic representation  Counts given per 5mL | CEE | CEE | sCTC | sCTC | tCTC | tCTC | nCEC | nCEC | aCEC | aCEC | tCEC | tCEC |
| --- | --- | --- | --- | --- | --- | --- | --- | --- | --- | --- | --- | --- |
| Patient | Healthy* | Non-Cancer afflicted | Healthy** | Non-Cancer afflicted | Healthy** | Non-Cancer afflicted | Healthy* | Non-Cancer afflicted | Healthy* | Non-Cancer afflicted | Healthy* | Non-Cancer afflicted |
| 1 | 165 | 81 | 2 | 7 | 0 | 1 | 2 | 54 | 0 | 6 | 0 | 0 |
| 2 | 55 | 60 | 1 | 3 | 0 | 0 | 1 | 21 | 0 | 4 | 0 | 0 |
| 3 | 68 | 309 | 0 | 3 | 0 | 0 | 0 | 11 | 0 | 1 | 0 | 0 |
| 4 | 69 | 433 | 0 | 2 | 0 | 0 | 0 | 4 | 0 | 0 | 0 | 0 |
| 5 | 83 | 315 | 0 | 2 | 0 | 0 | 0 | 2 | 0 | 0 | 0 | 0 |
| 6 | 62 | 309 | 0 | 1 | 0 | 0 | 0 | 1 | 0 | 0 | 0 | 0 |
| 7 | 41 | 234 | 0 | 1 | 0 | 0 | 0 | 0 | 0 | 0 | 0 | 0 |
| 8 | 103 | 261 | 0 | 1 | 0 | 0 | 0 | 0 | 0 | 0 | 0 | 0 |
| 9 | 268 | 657 | 0 | 0 | 0 | 0 | 0 | 0 | 0 | 0 | 0 | 0 |
| 10 | 147 |  | 0 |  | 0 | 0 | 0 |  | 0 |  | 0 |  |
| 11 |  |  | 0 |  | 0 |  |  |  |  |  |  |  |
| 12 |  |  | 0 |  | 0 |  |  |  |  |  |  |  |
| 13 |  |  | 0 |  | 0 |  |  |  |  |  |  |  |
| 14 |  |  | 0 |  | 0 |  |  |  |  |  |  |  |
| 15 |  |  | 0 |  | 0 |  |  |  |  |  |  |  |
| 16 |  |  | 0 |  | 0 |  |  |  |  |  |  |  |
| 17 |  |  | 0 |  | 0 |  |  |  |  |  |  |  |
| 18 |  |  | 0 |  | 0 |  |  |  |  |  |  |  |
| 19 |  |  | 0 |  | 0 |  |  |  |  |  |  |  |
| 20 |  |  | 0 |  | 0 |  |  |  |  |  |  |  |

* New recruitment healthy cohort (n=10)

**** old data from (Schreier et al. 2022 and new recruitment healthy cohort (n=20)**

**Supplemented table 2.** Test results, samples 1 - 7

| Systemic representation  Counts given per 5mL |  |  |  |  |  |  |  |  |  |  |  |  |  |  |  |  |  |  |  |  |  |
| --- | --- | --- | --- | --- | --- | --- | --- | --- | --- | --- | --- | --- | --- | --- | --- | --- | --- | --- | --- | --- | --- |
| Patient Code | BR01 |  |  | BR02 |  |  | BR05 |  |  | BR07 |  |  | BR08 |  |  | BR09 |  |  | BR12 |  |  |
| Stage | II/2A |  |  | II/2B |  |  | I/1A |  |  | III/3C |  |  | II/2A |  |  | I/1A |  |  | I/1a |  |  |
| Patient status | Before | After | Effect*** | Before | After | Effect | Before | After | Effect | Before | After | Effect | Before | After | Effect | Before | After | Effect | Before | After | Effect |
| **Cancer-present CASA** |  |  |  |  |  |  |  |  |  |  |  |  |  |  |  |  |  |  |  |  |  |
| CEE  Abnormality cutoff ≥225  Control cohort mean = 106.1* | 227 | 63 | 100%* | 474 | 124 | 73.8% | 279 | 227 | 18.6% | 93 | 83 | N.D. | 103 | 124 | N.D. | 165 | 62 | 100% | 185 | 123 | 33.5% |
| **Classes 1,4,6 CTC (tCTC)**  Abnormality ≥2 | 23 | 2 | 91.3% | 1 | 0 | 100% | 2 | 0 | 100% | 4 | 1 | 75% | 0 | 0 | N.D. | 6 | 0 | 100% | 6 | 1 | 83.3% |
| tCEC  Abnormality ≥1 | 0 | 0 | N.D. | 2 | 0 | 100% | 0 | 0 | N.D. | 1 | 0 | 100% | 0 | 0 | N.D. | 0 | 0 | N.D. | 1 | 0 | 100% |
| Response average |  |  | 95.7% |  |  | 91.3% |  |  | 59% |  |  | 87.5% |  |  | N.D. |  |  | 100% |  |  | 94.4% |
| **Systemic disease or cancer-absent CASA** |  |  |  |  |  |  |  |  |  |  |  |  |  |  |  |  |  |  |  |  |  |
| CTC classes  2, 3, 5 (sCTC)  Abnormality ≥3 (combi)  Abnormality ≥4  (class 3 only) | 41 | 8 | 80.5% | 8 | 8 | No Effect | 12 | 3 | 75% | 10 | 8 | 20% | 7 | 7 | No Effect | 7 | 3 (class 3 | 57.1% | 4 | 5 | No Effect |
| CEB  Abnormality ≥1 | 0 | 3 | No Effect | 0 | 1 | No Effect | 2 | 2 | No Effect | 0 | 0 | N.D. | 1 | 4 | No Effect | 0 | 0 | N.D. | 0 | 0 | N.D. |
| aCEC  Abnormality ≥1 | 0 | 0 | N.D. | 0 | 1 | No Effect | 0 | 0 | N.D. | 3 | 3 | No Effect | 0 | 0 | N.D. | 0 | 0 | N.D. | 2 | 0 | 100% |
| nCIC  Abnormality ≥5 | 11 | 0 | 100% | 7 | 11 | No Effect | 0 | 7 | No Effect | 22 | 31 | No Effect | 3 | 8 | No Effect | 2 | 8 | No Effect | 12 | 5 | 58.3% |
| aCIC  Abnormality ≥2 | 6 | 0 | 100% | 0 | 0 | N.D. | 0 | 0 | N.D | 1 | 10 | No Effect | 8 | 2 | 75% | 0 | 0 | N.D. | 5 | 0 | 100% |
| Response average |  |  | 70% |  |  | 0% |  |  | 25% |  |  | 5% |  |  | 19% |  |  | 28.5% |  |  | 64.6% |
| **Response to surgery Category** |  |  | **Strong** |  |  | **Partial** |  |  | **Partial** |  |  | **Partial** |  |  | **None** |  |  | **Complete** |  |  | **Partial** |
| **Side Effects panel** |  |  |  |  |  |  |  |  |  |  |  |  |  |  |  |  |  |  |  |  |  |
| CEBall | 3 | 38 | 11.6x | 8 | 21 | 2.5x | 19 | 12 | No Effect | 8 | 11 | 1.4x | 5 | 25 | 5x | 0 | 2 | 2x | 0 | 2 | 2x |
| CECall | 0 | 3 | 3x | 3 | 4 | 1.3x | 0 | 0 | N.D. | 17 | 13 | No Effect | 0 | 0 | N.D. | 0 | 0 | No Effect | 9 | 1 | No Effect |
| CICall | 18 | 0 | No effect | 7 | 11 | 1.6x | 0 | 7 | 7x | 23 | 41 | 1.8x | 11 | 10 | No Effect | 2 | 8 | 4x | 17 | 5 | No Effect |

*CEE value below average of 106.1 counts as 0 or full response

** Not detected abbreviated as N.D.

***Effect denotes the change in concentration given in percent

Supplemented table 2 continuation samples 8-14

| Systemic representation  Counts given per 5mL |  |  |  |  |  |  |  |  |  |  |  |  |  |  |  |  |  |  |  |  |  |
| --- | --- | --- | --- | --- | --- | --- | --- | --- | --- | --- | --- | --- | --- | --- | --- | --- | --- | --- | --- | --- | --- |
| Patient Code | BR03 |  |  | BR14 |  |  | BR06 |  |  | BR13 |  |  | BR17 |  |  | BR18 |  |  | BR16 |  |  |
| Stage | Stage II/2Alt 2B Rt. |  |  | Stage 1/1A |  |  | Stage III/3A |  |  | Stage 1/1A  Group 1 |  |  | Stage II  /2A |  |  | Stage I/1A |  |  | Stage 0 DCIS |  |  |
| Surgery | Before | After | Effect | Before | After | Effect | Before | After | Effect | Before | After | Effect | Before | After | Effect | Before | After | Effect | Before | After | Effect |
| **Cancer-present CASA** |  |  |  |  |  |  |  |  |  |  |  |  |  |  |  |  |  |  |  |  |  |
| CEE  Abnormality cutoff ≥225  Control cohort mean = 106.1* | 103 | 61 | N.D. | 123 | 82 | 100% | 227 | 103 | 100% | 206 | 206 | No Effect | 433 | 371 | 14% | 206 | 330 | No Effect | 455 | 123 | 73% |
| **Classes 1,4,6 CTC (tCTC)**  Abnormality ≥2 | 0 | 0 | N.D. | 1 | 0 | 100% | 1 | 0 | 100% | 3 | 1 | 66.7% | 12 | 1 | 92% | 6 | 0 | 100% | 4 | 0 | 100% |
| tCEC  Abnormality ≥1 | 0 | 0 | N.D. | 1 | 0 | 100% | 0 | 0 | N.D. | 0 | 3 | No Effect | 0 | 0 | N.D. | 17 | 0 | 100% | 1 | 0 | 100% |
| Response average |  |  | N.D. |  |  | 100% |  |  | 100% |  |  | 22.2% |  |  | 53% |  |  | 66.7% |  |  | 91% |
| **Systemic disease or cancer-absent CASA** |  |  |  |  |  |  |  |  |  |  |  |  |  |  |  |  |  |  |  |  |  |
| CTC classes  2, 3, 5 **(sCTC)**  Abnormality ≥3 (combi)  Abnormality ≥4  (class 3 only) | 2 | 1 | 50% | 7 | 1 | 85.7% | 1 | 0 | 100% | 4 | 10 | No Effect | 26 | 21 | 19.2% | 11 | 7 | 36.3% | 10 | 1 | 90% |
| aCEB  Abnormality ≥1 | 0 | 2 | No Effect | 2 | 0 | 100% | 0 | 4 | No Effect | 0 | 0 | N.D. | 3 | 3 | No Effect | 0 | 0 | N.D. | 0 | 0 | N.D. |
| aCEC  Abnormality ≥1 | 0 | 0 | N.D. | 0 | 1 | No Effect | 10 | 0 | 100% | 0 | 17 | No Effect | 0 | 0 | N.D. | 1 | 0 | 100% | 6 | 0 | 100% |
| nCIC  Abnormality ≥5 | 33 | 19 | 42.4% | 48 | 21 | 56.3% | 2 | 7 | No Effect | 6 | 22 | No Effect | 6 | 4 | 33.3% | 8 | 7 | 12.5% | 1 | 11 | No Effect |
| aCIC  Abnormality ≥2 | 4 | 0 | 100% | 4 | 4 | No Effect | 0 | 1 | No Effect | 0 | 4 | No Effect | 0 | 0 | N.D. | 0 | 0 | N.D. | 0 | 0 | N.D. |
| Response average |  |  | 48% |  |  | 48% |  |  | 40% |  |  | 0% |  |  | 17.5% |  |  | 49.6% |  |  | 63.3% |
| **Response to surgery Category** |  |  | **Complete** |  |  | **Complete** |  |  | **Complete** |  |  | **None** |  |  | **Partial** |  |  | **Partial** |  |  | **Complete** |
| **Side Effects panel** |  |  |  |  |  |  |  |  |  |  |  |  |  |  |  |  |  |  |  |  |  |
| CEBall | 39 | 70 | 1.8x | 7 | 9 | 1.3x | 20 | 31 | 1.6x | 11 | 24 | 2.2x | 13 | 19 | 1.5x | 3 | 27 | 9x | 3 | 10 | 3.3x |
| CECall | 3 | 3 | No Effect | 1 | 2 | 2x | 17 | 0 | No Effect | 0 | 68 | 51x | 1 | 0 | No Effect | 44 | 1 | No Effect | 67 | 1 | No Effect |
| CICall | 37 | 19 | No Effect | 52 | 25 | No Effect | 2 | 8 | 4x | 6 | 26 | 4.3x | 6 | 4 | No Effect | 8 | 7 | No Effect | 1 | 11 | 11x |
